# Supplementary material
Source: PubMed Central journal article supplement (PMC4205124)
Supplement: NIHMS254845-supplement-Supp_Fig_S2.pdf [file NIHMS254845-supplement-Supp_Fig_S2.pdf]

Figure S2

| Sample | Locus | Submitted                              |                  | Most Frequently Called |             | Agreement | Genotype Concordance | Manual Editing | Allele Concordance |
|--------|-------|----------------------------------------|------------------|------------------------|-------------|-----------|----------------------|----------------|--------------------|
|        |       | Allele 1                               | Allele 2         | Allele 1               | Allele 2    |           |                      |                |                    |
| 1      | HLA-A | A*0101                                 | A*3101           | A*01010101             | A*310102    | 7/7       | 7/7                  | 0              | 14/14              |
| 2      |       | A*2501/07                              | A*3101/14N/23    | A*250101               | A*310102    | 6/8       | 7/8                  | 1              | 14/16              |
| 3      |       | A*6803                                 | A*7401           | A*680301               | A*7401      | 7/7       | 7/7                  | 0              | 14/14              |
| 4      |       | A*0201                                 | A*2902           | A*02010101             | A*290201    | 8/8       | 8/8                  | 0              | 16/16              |
| 5      |       | A*0201                                 | A*6801           | A*02010101             | A*680102    | 8/8       | 8/8                  | 0              | 16/16              |
| 6      |       | A*2601                                 | A*7401           | A*260101               | A*7402      | 6/8       | 2/8                  | 2              | 10/16              |
| 7      |       | A*2501/07                              | A*2601/24/26     | A*250101               | A*260101    | 5/8       | 5/8                  | 0              | 12/16              |
| 8      |       | A*0205                                 | A*0230           | A*020501               | A*0230      | 8/8       | 8/8                  | 1              | 16/16              |
| 9      |       | A*3101                                 | A*6601           | A*310102               | A*6601      | 6/8       | 7/8                  | 0              | 14/16              |
| 10     |       | A*02 <sup>105</sup> 5bp ins Ex2 pos 30 | A*0301           | No matches             |             | (8/8)     | 0/0                  | --             | 0/0                |
| 11     |       | A*3001                                 | A*6802           | A*300101               | A*68020101  | 6/7       | 7/7                  | 1              | 14/14              |
| 12     |       | A*0101                                 | A*0201           | A*01010101             | A*02010101  | 6/6       | 6/6                  | 0              | 12/12              |
| 13     |       | A*1101                                 | A*2601           | A*110101               | A*260101    | 7/7       | 7/7                  | 2              | 14/14              |
| 14     |       | A*0101                                 | A*1101           | A*01010101             | A*110101    | 6/8       | 6/8                  | 6              | 12/16              |
| 15     |       | A*02DJZN                               | A*3101/14N/23    | A*02010101             | A*310102    | 8/8       | 8/8                  | 0              | 16/16              |
| 16     |       | A*0201                                 | A*0201           | A*02010101             | A*02010101  | 8/8       | 8/8                  | 1              | 16/16              |
| 17     |       | A*0201                                 | A*3201           | A*02010101             | A*320101    | 8/8       | 8/8                  | 1              | 16/16              |
| 18     |       | A*2402                                 | A*3201           | A*24020101             | A*320101    | 7/7       | 7/7                  | 1              | 14/14              |
| 19     |       | A*0239                                 | A*0301           | A*0239                 | A*03010101  | 3/7       | 7/7                  | 2              | 14/14              |
| 20     |       | A*010101                               | A*010101         | A*01010101             | A*01010101  | 7/8       | 7/8                  | 1              | 14/16              |
| 1      | HLA-B | B*1801                                 | B*4001           | B*180101               | B*400101    | 7/7       | 7/7                  | 0              | 14/14              |
| 2      |       | B*0702/44/49N/58/59/61                 | B*1801/17N       | B*070201               | B*180101    | 7/7       | 7/7                  | 0              | 14/14              |
| 3      |       | B*1503                                 | B*3905           | B*1503                 | B*3905      | 3/7       | 3/7                  | 4              | 10/14              |
| 4      |       | B*4403                                 | B*5101           | B*440301               | B*510101    | 6/7       | 6/7                  | 2              | 13/14              |
| 5      |       | B*1501                                 | B*5101           | B*15010101             | B*510101    | 7/7       | 7/7                  | 1              | 14/14              |
| 6      |       | B*5301                                 | B*5501           | B*530101               | B*550101    | 7/7       | 7/7                  | 1              | 14/14              |
| 7      |       | B*1302                                 | B*4102           | B*130201               | B*4102      | 8/8       | 8/8                  | 4              | 16/16              |
| 8      |       | B*1302                                 | B*5801           | B*130201               | B*580101    | 8/8       | 8/8                  | 2              | 16/16              |
| 9      |       | B*0706                                 | B*3508           | B*070501 <sup>+</sup>  | B*350801    | 8/8       | 8/8                  | 0              | 16/16              |
| 10     |       | B*0702                                 | B*1402           | B*070201               | B*140201    | 6/7       | 7/7                  | 1              | 14/14              |
| 11     |       | B*4201                                 | B*4201           | B*4201                 | B*4201      | 8/8       | 8/8                  | 0              | 16/16              |
| 12     |       | B*0702                                 | B*0801           | B*070201               | B*080101    | 7/7       | 7/7                  | 0              | 14/14              |
| 13     |       | B*3501                                 | B*3801           | B*350101               | B*380101    | 7/7       | 7/7                  | 1              | 14/14              |
| 14     |       | B*0801                                 | B*5101           | B*080101               | B*510101    | 5/7       | 7/7                  | 2              | 14/14              |
| 15     |       | B*5701                                 | B*6701           | B*570101               | B*670102    | 6/7       | 6/7                  | 3              | 12/14              |
| 16     |       | B*1501                                 | B*1501           | B*15010101             | B*15010101  | 8/8       | 8/8                  | 0              | 16/16              |
| 17     |       | B*1801                                 | B*2705           | B*180101               | B*270502    | 7/7       | 7/7                  | 0              | 14/14              |
| 18     |       | B*4002 <sup>8</sup> 8 bp del Ex2 end   | B*5101           | No matches             |             | (8/8)     | 0/0                  | --             | 0/0                |
| 19     |       | B*3509                                 | B*4402           | B*350901               | B*44020101  | 7/8       | 8/8                  | 1              | 16/16              |
| 20     |       | B*3701                                 | B*3701           | B*370101               | B*370101    | 8/8       | 8/8                  | 0              | 16/16              |
| 1      | HLA-C | Cw*0304                                | Cw*1203          | Cw*030401              | Cw*12030101 | 7/7       | 7/7                  | 0              | 14/14              |
| 2      |       | Cw*0702/50                             | Cw*0701/06/18/52 | Cw*070101              | Cw*07020101 | 6/7       | 7/7                  | 1              | 14/14              |
| 3      |       | Cw*0210                                | Cw*0702          | Cw*0210                | Cw*07020101 | 6/7       | 7/7                  | 1              | 14/14              |
| 4      |       | Cw*0501                                | Cw*1601          | Cw*05010101            | Cw*160101   | 7/7       | 7/7                  | 0              | 14/14              |
| 5      |       | Cw*0303                                | Cw*1502          | Cw*030301              | Cw*150201   | 7/7       | 7/7                  | 0              | 14/14              |
| 6      |       | Cw*0303                                | Cw*0401          | Cw*030301              | Cw*04010101 | 7/7       | 7/7                  | 0              | 14/14              |
| 7      |       | Cw*0602                                | Cw*1701/02/03    | Cw*06020101            | Cw*1701     | 7/7       | 7/7                  | 0              | 14/14              |
| 8      |       | Cw*0602                                | Cw*0718          | Cw*06020101            | Cw*070101   | 5/7       | 6/7                  | 1              | 13/14              |
| 9      |       | Cw*0401                                | Cw*1505          | Cw*04010101            | Cw*150501   | 8/8       | 8/8                  | 0              | 16/16              |
| 10     |       | Cw*0202                                | Cw*0702          | Cw*020202              | Cw*07020101 | 7/7       | 7/7                  | 0              | 14/14              |
| 11     |       | Cw*1701                                | Cw*1701          | Cw*1701                | Cw*1701     | 8/8       | 8/8                  | 0              | 16/16              |
| 12     |       | Cw*0701                                | Cw*0702          | Cw*070101              | Cw*07020101 | 8/8       | 8/8                  | 1              | 16/16              |
| 13     |       | Cw*0401                                | Cw*1203          | Cw*04010101            | Cw*12030101 | 7/8       | 8/8                  | 0              | 16/16              |
| 14     |       | Cw*0401                                | Cw*0701          | Cw*04010101            | Cw*070101   | 7/7       | 7/7                  | 0              | 14/14              |
| 15     |       | Cw*0602/11                             | Cw*1203/04       | Cw*06020101            | Cw*12030101 | 7/7       | 7/7                  | 2              | 14/14              |
| 16     |       | Cw*0303                                | Cw*0304          | Cw*030301              | Cw*030301   | 8/8       | 0/8                  | 0              | 8/16               |
| 17     |       | Cw*0202                                | Cw*0701          | Cw*020202              | Cw*070101   | 7/7       | 7/7                  | 0              | 14/14              |
| 18     |       | Cw*0306                                | Cw*1203          | Cw*0306                | Cw*12030101 | 8/8       | 8/8                  | 0              | 16/16              |
| 19     |       | Cw*0401                                | Cw*0501          | Cw*04010101            | Cw*05010101 | 3/6       | 6/6                  | 0              | 12/12              |
| 20     |       | Cw*0602                                | Cw*0602          | Cw*06020101            | Cw*06020101 | 7/8       | 7/8                  | 0              | 14/16              |
| 1      | DPB1  | DPB1*040101                            | DPB1*040101      | DPB1*040101            | DPB1*040101 | 8/8       | 8/8                  | 0              | 16/16              |
| 2      |       | DPB1*040101                            | DPB1*040101      | DPB1*040101            | DPB1*040101 | 7/8       | 8/8                  | 2              | 16/16              |
| 3      |       | DPB1*020102                            | DPB1*0402        | DPB1*020102            | DPB1*0402   | 8/8       | 8/8                  | 0              | 16/16              |
| 4      |       | DPB1*110101                            | DPB1*1401        | DPB1*110101            | DPB1*1401   | 8/8       | 8/8                  | 0              | 16/16              |
| 5      |       | DPB1*040101                            | DPB1*040101      | DPB1*040101            | DPB1*040101 | 8/8       | 8/8                  | 1              | 16/16              |
| 6      |       | DPB1*0401                              | DPB1*0402        | DPB1*040101            | DPB1*0402   | 8/8       | 8/8                  | 0              | 16/16              |
| 7      |       | DPB1*0402                              | DPB1*1701        | DPB1*0402              | DPB1*1701   | 8/8       | 8/8                  | 0              | 16/16              |
| 8      |       | DPB1*030101                            | DPB1*040101      | DPB1*030101            | DPB1*040101 | 8/8       | 8/8                  | 0              | 16/16              |
| 9      |       | DPB1*0101                              | DPB1*0401        | DPB1*010101            | DPB1*040101 | 8/8       | 8/8                  | 0              | 16/16              |
| 10     |       | DPB1*030101                            | DPB1*050101      | DPB1*030101            | DPB1*050101 | 7/7       | 7/7                  | 0              | 14/14              |
| 11     |       | DPB1*010101                            | DPB1*0402        | DPB1*010101            | DPB1*0402   | 8/8       | 8/8                  | 0              | 16/16              |
| 12     |       | DPB1*020102                            | DPB1*040101      | DPB1*020102            | DPB1*040101 | 8/8       | 8/8                  | 0              | 16/16              |
| 13     |       | DPB1*0101                              | DPB1*1501        | DPB1*010101            | DPB1*1501   | 8/8       | 8/8                  | 0              | 16/16              |
| 14     |       | DPB1*010101                            | DPB1*200101      | DPB1*010101            | DPB1*200101 | 8/8       | 8/8                  | 0              | 16/16              |
| 15     |       | DPB1*040101                            | DPB1*0902        | DPB1*040101            | DPB1*0902   | 7/7       | 8/8                  | 1              | 14/14              |
| 16     |       | DPB1*040101                            | DPB1*040101      | DPB1*040101            | DPB1*040101 | 8/8       | 8/8                  | 0              | 16/16              |
| 17     |       | DPB1*030101                            | DPB1*200101      | DPB1*030101            | DPB1*200101 | 8/8       | 8/8                  | 0              | 16/16              |
| 18     |       | DPB1*020102                            | DPB1*050101      | DPB1*020102            | DPB1*050101 | 8/8       | 8/8                  | 0              | 16/16              |
| 19     |       | DPB1*040101                            | DPB1*1001        | DPB1*040101            | DPB1*1001   | 8/8       | 8/8                  | 0              | 16/16              |
| 20     |       | DPB1*040101                            | DPB1*1401        | DPB1*040101            | DPB1*1401   | 8/8       | 8/8                  | 0              | 16/16              |
| 1      | DQA1  | DQA1*010101                            | DQA1*010101      | DQA1*010101            | DQA1*010101 | 8/8       | 8/8                  | 2              | 16/16              |
| 2      |       | DQA1*030101                            | DQA1*050101      | DQA1*030101            | DQA1*050101 | 8/8       | 8/8                  | 0              | 16/16              |
| 3      |       | DQA1*030101                            | DQA1*050101      | DQA1*030101            | DQA1*050101 | 8/8       | 8/8                  | 0              | 16/16              |
| 4      |       | DQA1*0201                              | DQA1*0201        | DQA1*0201              | DQA1*0201   | 8/8       | 8/8                  | 0              | 16/16              |
| 5      |       | DQA1*0103                              | DQA1*0103        | DQA1*0103              | DQA1*0103   | 8/8       | 8/8                  | 2              | 16/16              |
| 6      |       | DQA1*030101                            | DQA1*050101      | DQA1*030101            | DQA1*050101 | 8/8       | 8/8                  | 0              | 16/16              |
| 7      |       | DQA1*0201                              | DQA1*050101      | DQA1*0201              | DQA1*050101 | 8/8       | 8/8                  | 0              | 16/16              |
| 8      |       | DQA1*010201                            | DQA1*0201        | DQA1*010201            | DQA1*0201   | 8/8       | 8/8                  | 0              | 16/16              |
| 9      |       | DQA1*010201                            | DQA1*050101      | DQA1*010201            | DQA1*050101 | 8/8       | 8/8                  | 0              | 16/16              |
| 10     |       | DQA1*010101                            | DQA1*030101      | DQA1*010101            | DQA1*030101 | 7/7       | 7/7                  | 0              | 14/14              |
| 11     |       | DQA1*0401                              | DQA1*0401        | DQA1*040101            | DQA1*040101 | 8/8       | 8/8                  | 1              | 16/16              |

|    |          |               |                                        |                            |                            |       |     |    |       |
|----|----------|---------------|----------------------------------------|----------------------------|----------------------------|-------|-----|----|-------|
| 12 |          | DQA1*030101   | DQA1*050101                            | DQA1*030101                | DQA1*050101                | 7/7   | 7/7 | 0  | 14/14 |
| 13 |          | DQA1*010101   | DQA1*0103                              | DQA1*010101                | DQA1*0103                  | 7/7   | 7/7 | 0  | 14/14 |
| 14 |          | DQA1*030101   | DQA1*050101                            | DQA1*030101                | DQA1*050101                | 8/8   | 8/8 | 0  | 16/16 |
| 15 |          | DQA1*010101   | DQA1*0103                              | DQA1*010101                | DQA1*0103                  | 8/8   | 8/8 | 0  | 16/16 |
| 16 |          | DQA1*010201   | DQA1*0103                              | DQA1*010201                | DQA1*0103                  | 8/8   | 8/8 | 3  | 16/16 |
| 17 |          | DQA1*030101   | DQA1*030101                            | DQA1*030101                | DQA1*030101                | 8/8   | 8/8 | 0  | 16/16 |
| 18 |          | DQA1*010101   | DQA1*030101                            | DQA1*010101                | DQA1*030101                | 8/8   | 8/8 | 0  | 16/16 |
| 19 |          | DQA1*010201   | DQA1*050101                            | DQA1*010201                | DQA1*050101                | 8/8   | 8/8 | 0  | 16/16 |
| 20 |          | DQA1*010201   | DQA1*010201                            | DQA1*010201                | DQA1*010201                | 8/8   | 8/8 | 0  | 16/16 |
| 1  | DQB1     | DQB1*0501     | DQB1*05                                | DQB1*050101                | DQB1*050301                | 8/8   | 8/8 | 0  | 16/16 |
| 2  |          | DQB1*030101   | DQB1*030302                            | DQB1*030101                | DQB1*030302                | 8/8   | 8/8 | 0  | 16/16 |
| 3  |          | DQB1*0201     | DQB1*0302                              | DQB1*020101                | DQB1*030201                | 8/8   | 8/8 | 0  | 16/16 |
| 4  |          | DQB1*0202     | DQB1*02 <sup>52</sup> possible variant | No matches                 |                            | (8/8) | 0/0 | -- | 0/0   |
| 5  |          | DQB1*0603     | DQB1*0603                              | DQB1*060301                | DQB1*060301                | 8/8   | 8/8 | 1  | 16/16 |
| 6  |          | DQB1*0301     | DQB1*0302                              | DQB1*030101                | DQB1*030201                | 8/8   | 8/8 | 0  | 16/16 |
| 7  |          | DQB1*0202/03  | DQB1*0301/04                           | DQB1*0202                  | DQB1*030101                | 8/8   | 8/8 | 0  | 16/16 |
| 8  |          | DQB1*0202     | DQB1*0609                              | DQB1*0202                  | DQB1*0609                  | 8/8   | 8/8 | 2  | 16/16 |
| 9  |          | DQB1*0201     | DQB1*0602                              | DQB1*020101                | DQB1*060201                | 8/8   | 8/8 | 1  | 16/16 |
| 10 |          | DQB1*0302     | DQB1*0501                              | DQB1*030201                | DQB1*050101                | 8/8   | 8/8 | 0  | 16/16 |
| 11 |          | DQB1*0402     | DQB1*0402                              | DQB1*0402                  | DQB1*0402                  | 8/8   | 8/8 | 0  | 16/16 |
| 12 |          | DQB1*0201     | DQB1*0303                              | DQB1*020101                | DQB1*030302                | 8/8   | 8/8 | 0  | 16/16 |
| 13 |          | DQB1*0501     | DQB1*0603                              | DQB1*050101                | DQB1*060301                | 8/8   | 8/8 | 0  | 16/16 |
| 14 |          | DQB1*0201     | DQB1*0302                              | DQB1*020101                | DQB1*030201                | 7/8   | 8/8 | 2  | 16/16 |
| 15 |          | DQB1*0501     | DQB1*0603                              | DQB1*050101                | DQB1*060301                | 8/8   | 8/8 | 0  | 16/16 |
| 16 |          | DQB1*0603     | DQB1*0604                              | DQB1*060301                | DQB1*060401                | 8/8   | 8/8 | 1  | 16/16 |
| 17 |          | DQB1*0301     | DQB1*0302                              | DQB1*030101                | DQB1*030201                | 8/8   | 8/8 | 0  | 16/16 |
| 18 |          | DQB1*0302     | DQB1*0501                              | DQB1*030201                | DQB1*050101                | 8/8   | 8/8 | 0  | 16/16 |
| 19 |          | DQB1*0301     | DQB1*0502                              | DQB1*030101                | DQB1*050201                | 8/8   | 8/8 | 0  | 16/16 |
| 20 |          | DQB1*050201   | DQB1*050201                            | DQB1*050201                | DQB1*050201                | 8/8   | 8/8 | 0  | 16/16 |
| 1  | DRB1     | DRB1*0101     | DRB1*1401                              | DRB1*010101                | DRB1*140101                | 8/8   | 8/8 | 0  | 16/16 |
| 2  |          | DRB1*090102   | DRB1*130301                            | DRB1*090102                | DRB1*130301                | 7/7   | 7/7 | 0  | 14/14 |
| 3  |          | DRB1*0301     | DRB1*0407                              | DRB1*03010101              | DRB1*040701                | 7/7   | 7/7 | 0  | 14/14 |
| 4  |          | DRB1*0701     | DRB1*0701                              | DRB1*07010101              | DRB1*07010101              | 8/8   | 8/8 | 5  | 16/16 |
| 5  |          | DRB1*1301     | DRB1*1301                              | DRB1*130101                | DRB1*130101                | 8/8   | 8/8 | 1  | 16/16 |
| 6  |          | DRB1*0401     | DRB1*1103                              | DRB1*040101                | DRB1*1103                  | 7/7   | 7/7 | 1  | 14/14 |
| 7  |          | DRB1*0701     | DRB1*1303                              | DRB1*07010101              | DRB1*130301                | 8/8   | 8/8 | 0  | 16/16 |
| 8  |          | DRB1*0701     | DRB1*1302                              | DRB1*07010101              | DRB1*130201                | 8/8   | 8/8 | 0  | 16/16 |
| 9  |          | DRB1*0301     | DRB1*1501                              | DRB1*03010101              | DRB1*15010101              | 8/8   | 8/8 | 0  | 16/16 |
| 10 |          | DRB1*0103     | DRB1*0402                              | DRB1*0103                  | DRB1*0402                  | 8/8   | 8/8 | 0  | 16/16 |
| 11 |          | DRB1*030201   | DRB1*030201                            | DRB1*030201                | DRB1*030201                | 7/8   | 7/8 | 2  | 14/16 |
| 12 |          | DRB1*0301     | DRB1*0901                              | DRB1*03010101              | DRB1*090102                | 8/8   | 8/8 | 0  | 16/16 |
| 13 |          | DRB1*0101     | DRB1*1301                              | DRB1*010101                | DRB1*130101                | 8/8   | 8/8 | 1  | 16/16 |
| 14 |          | DRB1*0301     | DRB1*0404                              | DRB1*03010101              | DRB1*0404                  | 8/8   | 8/8 | 0  | 16/16 |
| 15 |          | DRB1*0101     | DRB1*1301                              | DRB1*010101                | DRB1*130101                | 8/8   | 8/8 | 0  | 16/16 |
| 16 |          | DRB1*1301     | DRB1*1302                              | DRB1*130101                | DRB1*130201                | 8/8   | 8/8 | 2  | 16/16 |
| 17 |          | DRB1*0401     | DRB1*0404                              | DRB1*040101                | DRB1*0404                  | 8/8   | 8/8 | 0  | 16/16 |
| 18 |          | DRB1*0101     | DRB1*0411                              | DRB1*010101                | DRB1*0411                  | 8/8   | 8/8 | 0  | 16/16 |
| 19 |          | DRB1*1402     | DRB1*1601                              | DRB1*1402                  | DRB1*160101                | 8/8   | 8/8 | 0  | 16/16 |
| 20 |          | DRB1*160101   | DRB1*160101                            | DRB1*160101                | DRB1*160101                | 5/8   | 5/8 | 3  | 12/16 |
| 1  | DRB3/4/5 | DRB3*0202     |                                        | DRB3*020201                | DRB3*020201 <sup>Δ</sup>   | 8/8   | 8/8 | 1  | 15/15 |
| 2  |          | DRB4*01010101 | DRB3*01010201                          | DRB4*01010101              | DRB3*01010201              | 7/7   | 7/7 | 0  | 14/14 |
| 3  |          | DRB4*01010101 | DRB3*020201                            | DRB4*01010101              | DRB3*020201                | 7/7   | 7/7 | 0  | 14/14 |
| 4  |          | DRB4*01010101 | DRB4*01010101                          | DRB4*01010101              | DRB4*01010101              | 8/8   | 8/8 | 1  | 16/16 |
| 5  |          | DRB3*01       | DRB3*0202                              | DRB3*01010201              | DRB3*020201                | 8/8   | 8/8 | 1  | 16/16 |
| 6  |          | DRB4*01010101 | DRB3*020201                            | DRB4*01010101              | DRB3*020201                | 8/8   | 8/8 | 1  | 16/16 |
| 7  |          | DRB4*01010101 | DRB3*01010201                          | DRB4*01010101              | DRB3*01010201              | 8/8   | 8/8 | 2  | 16/16 |
| 8  |          | DRB4*01010101 | DRB3*030101                            | DRB4*01010101              | DRB3*030101                | 8/8   | 8/8 | 0  | 16/16 |
| 9  |          | DRB5*010101   | DRB3*01010201                          | DRB5*010101                | DRB3*01010201              | 8/8   | 8/8 | 1  | 16/16 |
| 10 |          | DRB4*01010101 |                                        | DRB4*01010101              | DRB4*01010101 <sup>Δ</sup> | 8/8   | 8/8 | 1  | 15/15 |
| 11 |          | DRB3*01010201 | DRB3*01010201                          | DRB3*01010201              | DRB3*01010201              | 8/8   | 8/8 | 4  | 16/16 |
| 12 |          | DRB3*01       | DRB4*01                                | DRB4*01010101              | DRB3*01010201              | 8/8   | 8/8 | 1  | 16/16 |
| 13 |          | DRB3*01010201 |                                        | DRB3*01010201              | DRB3*01010201 <sup>Δ</sup> | 8/8   | 8/8 | 1  | 15/15 |
| 14 |          | DRB3*0101     | DRB4*0103                              | DRB4*01010101              | DRB3*01010201              | 8/8   | 8/8 | 0  | 16/16 |
| 15 |          | DRB3*01010201 |                                        | DRB3*01010201              | DRB3*01010201 <sup>Δ</sup> | 8/8   | 8/8 | 2  | 15/15 |
| 16 |          | DRB3*0202     | DRB3*0301                              | DRB3*020201                | DRB3*030101                | 8/8   | 8/8 | 0  | 16/16 |
| 17 |          | DRB4*0103     | DRB4*0103                              | DRB4*01010101 <sup>‡</sup> | DRB4*01010101 <sup>‡</sup> | 8/8   | 8/8 | 0  | 16/16 |
| 18 |          | DRB4*01010101 |                                        | DRB4*01010101              | DRB4*01010101 <sup>Δ</sup> | 8/8   | 8/8 | 0  | 15/15 |
| 19 |          | DRB3*01010201 | DRB5*0202                              | DRB3*01010201              | DRB5*0202                  | 8/8   | 8/8 | 0  | 16/16 |
| 20 |          | DRB5*0202     | DRB5*0202                              | DRB5*0202                  | DRB5*0202                  | 4/8   | 4/8 | 4  | 12/16 |

KEY:

|                                                                         |
|-------------------------------------------------------------------------|
| Unambiguous by 454 at sites in agreement                                |
| Man ed required only for additional concordant samples                  |
| Genotype incorrect                                                      |
| Based on the 454 consensus sequence in study                            |
| <sup>52</sup> New Allele; not in database                               |
| <sup>Δ</sup> DRB3,4,5 hemizygotes appear as homozygotes in Conexio ATF  |
| <sup>‡</sup> Correct genotype in ambiguity string                       |
| ( ) Based on initial Genotyping Report                                  |
| DJZN 0201/0201L/0209/0220/0243N/0266/0275/0283N/0289/0297/9232/9234/924 |
